# Supplementary material for: Effects of Mindfulness-Based Therapy on Clinical Symptoms and DNA Methylation in Patients with Polycystic Ovary Syndrome and High Metabolic Risk
Source: MDPI journal article supplement (doi:10.3390/cimb45040178), 2023-03-24
Supplement: s1 [file s1]

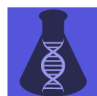

Supplementary Materials for Article

# Effects of Mindfulness-Based Therapy on Clinical Symptoms and DNA Methylation in Patients with Polycystic Ovary Syndrome and High Metabolic Risk

Hana Dema <sup>1</sup>, Alja Videtič Paska <sup>2,\*</sup>, Katarina Kouter <sup>2</sup>, Mojca Katrašnik <sup>2</sup>, Mojca Jensterle <sup>3,4</sup>, Andrej Janež <sup>3,4</sup>, Aleš Oblak <sup>5</sup>, Borut Škodlar <sup>5,6</sup> and Jurij Bon <sup>5,6,\*</sup>

<sup>1</sup> Department of Health Care Quality, University Medical Centre Ljubljana, SI-1000 Ljubljana, Slovenia

<sup>2</sup> Institute for Biochemistry and Molecular Genetics, Faculty of Medicine, University of Ljubljana, SI-1000 Ljubljana, Slovenia

<sup>3</sup> Department of Endocrinology, Diabetes and Metabolic Diseases, University Medical Centre Ljubljana, SI-1000 Ljubljana, Slovenia

<sup>4</sup> Department of Internal Medicine, Faculty of Medicine, University of Ljubljana, SI-1000 Ljubljana, Slovenia

<sup>5</sup> University Psychiatric Clinic Ljubljana, SI-1260 Ljubljana, Slovenia

<sup>6</sup> Department of Psychiatry, Faculty of Medicine, University of Ljubljana, SI-1000 Ljubljana, Slovenia

\* Correspondence: alja.videtic@mf.uni-lj.si (A.V.P.); jurij.bon@mf.uni-lj.si (J.B.)

**Abstract:** Polycystic ovary syndrome (PCOS) is an endocrine and metabolic disorder affecting women of reproductive age. Research has shown that epigenetic alterations such as DNA methylation may play a role in the development and progression of abnormal ovarian function and metabolic disorders in PCOS. Among other epigenetic changes, studies have identified specific genes (related with insulin signalling and steroid hormone metabolism) that are methylated in women with PCOS. DNA methylation appears to respond to various interventions aimed at altering health and lifestyle factors. We tested the efficacy of a mindfulness-based stress reduction program (MBSR) in PCOS patients. We examined its effects on anthropometric measurements, mental health and wellbeing, and alterations in DNA methylation in peripheral blood. MBSR was associated with a reduction in body mass index, waist circumference and blood glucose level, an improvement in subjectively perceived general health, emotional role limitation, and levels of pain, as well as mindfulness-like traits. MBSR reduced the expression of anxious symptomatology and subjectively perceived stress. Methylation changes were observed in four genes: COMT, FST, FKBP51, and MAOA. We conclude that MBSR may be a useful supplementary therapy to mitigate the deleterious effects of PCOS on mental health.

**Keywords:** mindfulness-based stress reduction program, polycystic ovary syndrome, epigenetics, DNA methylation, candidate genes, depression, anxiety

**Citation:** Dema, H.; Videtič Paska, A.; Kouter, K.; Katrašnik, M.; Jensterle, M.; Janež, A.; Oblak, A.; Škodlar, B.; Bon, J. Effects of Mindfulness-Based Therapy on Clinical Symptoms and DNA Methylation in Patients with Polycystic Ovary Syndrome and High Metabolic Risk. *Curr. Issues Mol. Biol.* **2023**, *45*, 2717–2737. <https://doi.org/10.3390/cimb45040178>

Academic Editors: Hsien-Ming Wu

Received: 23 February 2023

Revised: 19 March 2023

Accepted: 23 March 2023

Published: 24 March 2023

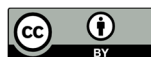

**Copyright:** © 2023 by the authors. Submitted for possible open access publication under the terms and conditions of the Creative Commons Attribution (CC BY) license (<https://creativecommons.org/licenses/by/4.0/>).

**Table S1.** Amplicon primer sequences and annealing temperatures for candidate genes. Illumina universal sequences are presented in grey shade and are followed by the sequence-specific primers that align on the target bisulfite converted DNA sequence.

| Amplicon               | Forward or reverse primer | Primer Sequence                                              | Annealing temperature / °C |
|------------------------|---------------------------|--------------------------------------------------------------|----------------------------|
| SLC6A4_3               | Forward primer            | TCGTCGGCAGCGTCAGATGTGTATAAGAGACAGTTTAAAGAGTAGGAAAGTTAGGATTTT | 54.0                       |
|                        | Reverse primer            | GTCTCGTGGGCTCGGAGATGTGTATAAGAGACAGACCCCTCACATAATCTAATCTCTAAA |                            |
| SLC6A4_5               | Forward primer            | TCGTCGGCAGCGTCAGATGTGTATAAGAGACAGTTTGAGTAGTTGGGAATATAAG      | 52.0                       |
|                        | Reverse primer            | GTCTCGTGGGCTCGGAGATGTGTATAAGAGACAGAGAAAACCCCTTATCTAATTCCTCTC |                            |
| COMT_1 <sup>a</sup>    | Forward primer            | TCGTCGGCAGCGTCAGATGTGTATAAGAGACAGGTTTTTAATTTTGTATAGGTAAGAT   | 54.0                       |
|                        | Reverse primer            | GTCTCGTGGGCTCGGAGATGTGTATAAGAGACAGTACCCTCCCTACCCACAAC        |                            |
| COMT_2 <sup>a</sup>    | Forward primer            | TCGTCGGCAGCGTCAGATGTGTATAAGAGACAGGGTTATTTGTGGTTAGAAGTAGTT    | 54.0                       |
|                        | Reverse primer            | GTCTCGTGGGCTCGGAGATGTGTATAAGAGACAGACACCCCAAAAACCCAC          |                            |
| COMT_4 <sup>a</sup>    | Forward primer            | TCGTCGGCAGCGTCAGATGTGTATAAGAGACAGNNTGTAGGAGGATATAGAGTATTGG   | 62.0                       |
|                        | Reverse primer            | GTCTCGTGGGCTCGGAGATGTGTATAAGAGACAGAGNNTCATAACCCACTCCTTCTACT  |                            |
| BDNF_81_1 <sup>a</sup> | Forward primer            | TCGTCGGCAGCGTCAGATGTGTATAAGAGACAGTGAGGGTAGGTAAAGGGTAGT       | 55.3                       |
|                        | Reverse primer            | GTCTCGTGGGCTCGGAGATGTGTATAAGAGACAGCAACTCTCCCAAAAACCCCTAC     |                            |
| BDNF_81_2 <sup>a</sup> | Forward primer            | TCGTCGGCAGCGTCAGATGTGTATAAGAGACAGTTATATAGTTTTTGTGGTAATTAG    | 55.0                       |
|                        | Reverse primer            | GTCTCGTGGGCTCGGAGATGTGTATAAGAGACAGAGAAAAAATAAATCTTCTTAAAAAAT |                            |
| BDNF_81_3 <sup>a</sup> | Forward primer            | TCGTCGGCAGCGTCAGATGTGTATAAGAGACAGTTTTTTAGTTATGATGGGGGAGG     | 58.0                       |
|                        | Reverse primer            | GTCTCGTGGGCTCGGAGATGTGTATAAGAGACAGCAAATCACACCTAAAACCTCC      |                            |
| BDNF_14_1 <sup>a</sup> | Forward primer            | TCGTCGGCAGCGTCAGATGTGTATAAGAGACAGGAGTTTATTTAGTATTTTGGATAGA   | 55.3                       |
|                        | Reverse primer            | GTCTCGTGGGCTCGGAGATGTGTATAAGAGACAGAGAAAAATCTATTCCAACCTACACC  |                            |
| BDNF_58_1 <sup>a</sup> | Forward primer            | TCGTCGGCAGCGTCAGATGTGTATAAGAGACAGTTTTTTTAAGGGAAGGGGAGTT      | 54.0                       |
|                        | Reverse primer            | GTCTCGTGGGCTCGGAGATGTGTATAAGAGACAGAGAAACTAAAAATATTCTTCTCCACC |                            |
| BDNF_58_2 <sup>a</sup> | Forward primer            | TCGTCGGCAGCGTCAGATGTGTATAAGAGACAGATAGAGTTATTAATTAGTTGGA      | 55.0                       |

|                        |                 |                                                                |      |
|------------------------|-----------------|----------------------------------------------------------------|------|
|                        | Reverse primer  | GTCTCGTGGGCTCGGAGATGTGTATAAGAGACAG-TAAATCCCTAAACTCCCTAAAA      |      |
| BDNF_95_1 <sup>a</sup> | For-ward primer | TCGTCGGCAGCGTCAGATGTGTATAAGAGACAGGGTTTTAATGAGATATTTAT          | 58.0 |
|                        | Reverse primer  | GTCTCGTGGGCTCGGAGATGTGTATAAGAGACAGAAAAATCCCCCAATCAACTCTCT      |      |
| BDNF_95_2 <sup>a</sup> | For-ward primer | TCGTCGGCAGCGTCAGATGTGTATAAGAGACAGAAATGTTGTTATTATTTTGATTGAATT   | 54.0 |
|                        | Reverse primer  | GTCTCGTGGGCTCGGAGATGTGTATAAGAGACAGAACACCCAAATTCTCTAAAAAA       |      |
| BDNF_95_5 <sup>a</sup> | For-ward primer | TCGTCGGCAGCGTCAGATGTGTATAAGAGACAGNNTTTTTTAGAGAATTGGGTGT        | 56.7 |
|                        | Reverse primer  | GTCTCGTGGGCTCGGAGATGTGTATAAGAGACAGNNAACCTATCCTCACCTCCT         |      |
| TPH2_1 <sup>b</sup>    | For-ward primer | TCGTCGGCAGCGTCAGATGTGTATAAGAGACAGAGGTTTGTAATTTGATTGTGGT        | 52.0 |
|                        | Reverse primer  | GTCTCGTGGGCTCGGAGATGTGTATAAGAGACAGCCCAATTTACTAAAAAACATCATCA    |      |
| HTR1A_1 <sup>b</sup>   | For-ward primer | TCGTCGGCAGCGTCAGATGTGTATAAGAGACAGTTTTAGATATTTTGGATTGGAGAT      | 55.0 |
|                        | Reverse primer  | GTCTCGTGGGCTCGGAGATGTGTATAAGAGACAGCAAAAACCCAAACAAAAAATTCTTAC   |      |
| HTR1A_2 <sup>b</sup>   | For-ward primer | TCGTCGGCAGCGTCAGATGTGTATAAGAGACAGTGGTTATTGGTTTTTTTATTTTTAT     | 50.0 |
|                        | Reverse primer  | GTCTCGTGGGCTCGGAGATGTGTATAAGAGACAGCTCCATTCACACTCTTCTTAAAC      |      |
| MAOA_1 <sup>b</sup>    | For-ward primer | TCGTCGGCAGCGTCAGATGTGTATAAGAGACAGGATAGTTTTAGTTAAAATTAAAGAATGAA | 50.0 |
|                        | Reverse primer  | GTCTCGTGGGCTCGGAGATGTGTATAAGAGACAGTACCCACTCTTAAAAACCAACC       |      |
| MAOA_2 <sup>b</sup>    | For-ward primer | TCGTCGGCAGCGTCAGATGTGTATAAGAGACAGGGGAGTTGATAGAAGGGTTTTTTT      | 59.0 |
|                        | Reverse primer  | GTCTCGTGGGCTCGGAGATGTGTATAAGAGACAGCAAACCATAACTACACTACACTCTC    |      |
| CEBPB_1                | For-ward primer | TCGTCGGCAGCGTCAGATGTGTATAAGAGACAGTGGTTTGATTTAGTATGTT           | 52.1 |
|                        | Reverse primer  | GTCTCGTGGGCTCGGAGATGTGTATAAGAGACAGTTCTTACAATTCTTACCCCC         |      |
| CEBPB_2                | For-ward primer | TCGTCGGCAGCGTCAGATGTGTATAAGAGACAGGATTGGGAAGGGGATTTAT           | 50.2 |
|                        | Reverse primer  | GTCTCGTGGGCTCGGAGATGTGTATAAGAGACAGACCACTTCCATAAATTTAAAAACA     |      |
| EPHX1_2                | For-ward primer | TCGTCGGCAGCGTCAGATGTGTATAAGAGACAGTGTAGAGGGATTTGTAGTTGGTT       | 55.3 |
|                        | Reverse primer  | GTCTCGTGGGCTCGGAGATGTGTATAAGAGACAGACTTAAATAACAAATTAAATACATTTTC |      |

|                        |                        |                                                                  |      |
|------------------------|------------------------|------------------------------------------------------------------|------|
| EPM2A_1                | For-<br>ward<br>primer | TCGTCGGCAGCGTCAGATGTGTATAAGAGACAGTTGGGGT<br>GGTGGTGTTAT          | 55.3 |
|                        | Reverse<br>primer      | GTCTCGTGGGCTCGGAGATGTGTATAAGAGACAGATACCT<br>TCCCAAAAAAAGTCTCC    |      |
| FKBP51_F1 <sup>c</sup> | For-<br>ward<br>primer | TCGTCGGCAGCGTCAGATGTGTATAAGAGACAGAGGGGGT<br>GTTAGTTTTTATTATTTTTT | 50.2 |
|                        | Reverse<br>primer      | GTCTCGTGGGCTCGGAGATGTGTATAAGAGACAGACTCCG<br>CTAACCCTTCAAC        |      |
| FST_1                  | For-<br>ward<br>primer | TCGTCGGCAGCGTCAGATGTGTATAAGAGACAGAGGATAG<br>AAATTGGGGAGTTTT      | 55.3 |
|                        | Reverse<br>primer      | GTCTCGTGGGCTCGGAGATGTGTATAAGAGACAGTACCTA<br>ACTTACAACCACCCC      |      |
| FST_2                  | For-<br>ward<br>primer | TCGTCGGCAGCGTCAGATGTGTATAAGAGACAGTTTGAAGT<br>GGGTGTTTTTTTTT      | 50.2 |
|                        | Reverse<br>primer      | GTCTCGTGGGCTCGGAGATGTGTATAAGAGA-<br>CAGATCAAATAACATTTCCACCTT     |      |
| FST_3                  | For-<br>ward<br>primer | TCGTCGGCAGCGTCAGATGTGTATAAGAGACAGAGAAGGT<br>GGGAAATGTTATTG       | 55.3 |
|                        | Reverse<br>primer      | GTCTCGTGGGCTCGGAGATGTGTATAAGAGA-<br>CAGAACAAACAAAAACAAAACCCAC    |      |
| IGFBP1_1               | For-<br>ward<br>primer | TCGTCGGCAGCGTCAGATGTGTATAAGAGACAGGGTTT-<br>GTGTTTTTTATAAGGTG     | 55.3 |
|                        | Reverse<br>primer      | GTCTCGTGGGCTCGGAGATGTGTATAAGAGA-<br>CAGATCAACAAAAACAATACCAACCA   |      |
| IGFBP1_2               | For-<br>ward<br>primer | TCGTCGGCAGCGTCAGATGTGTATAAGAGACAGGGTTGG-<br>TATTGTTTTTGTGA       | 50.2 |
|                        | Reverse<br>primer      | GTCTCGTGGGCTCGGAGATGTGTATAAGAGACAG-<br>CAAAAATTACTACTCCCCC       |      |
| INSR_1                 | For-<br>ward<br>primer | TCGTCGGCAGCGTCAGATGTGTATAAGAGACAGGATGGG-<br>GAGAGGATTTTATTTA     | 50.2 |
|                        | Reverse<br>primer      | GTCTCGTGGGCTCGGAGATGTGTATAAGAGA-<br>CAGAACCCAATAACCCCACTC        |      |
| LHCGR_1                | For-<br>ward<br>primer | TCGTCGGCAGCGTCAGATGTGTATAAGAGACAGAGTAG-<br>GAAGGAGGTTATTGGGTTAT  | 56.7 |
|                        | Reverse<br>primer      | GTCTCGTGGGCTCGGAGATGTGTATAAGAGACAGC-<br>TACAACAACAACAACAACCTCAAC |      |
| NR3C1_1 <sup>c</sup>   | For-<br>ward<br>primer | TCGTCGGCAGCGTCAGATGTGTATAAGAGACAGTTTTT-<br>GAAGTTTTTTTAGAGGG     | 55.3 |
|                        | Reverse<br>primer      | GTCTCGTGGGCTCGGAGATGTGTATAAGAGA-<br>CAGAATTTCTCCAATTTCTTTCTC     |      |
| PPRG1A_1               | For-<br>ward<br>primer | TCGTCGGCAGCGTCAGATGTGTATAAGAGACAGTAG-<br>GATTGTGTGTGGAGTTGTT     | 52.1 |
|                        | Reverse<br>primer      | GTCTCGTGGGCTCGGAGATGTGTATAAGAGACAGCCAAC-<br>TACCAAAAAAAGACTC     |      |
| TBKBP1_1               | For-<br>ward<br>primer | TCGTCGGCAGCGTCAGATGTGTATAAGAGACAG-<br>GAAGGTATTTATTGATTGA        | 52.1 |

---

Reverse primer GTCTCGTGGGCTCGGAGATGTGTATAAGAGA-  
CAGAATTCCCAAACTATCTC

---

<sup>a</sup>Primer design according to Kouter et al. [99].

<sup>b</sup>Primer design according to Kouter et al. [60].

<sup>c</sup>Primer design according to Yehuda et al. [63].

60. Kouter, K.; Zupanc, T.; Videtič Paska, A. Targeted sequencing approach: Comprehensive analysis of DNA methylation and gene expression across blood and brain regions in suicide victims. *World J Biol Psychiatry* **2023**, *24*, 12-23. 10.1080/15622975.2022.2046291
63. Yehuda, R.; Daskalakis, N.P.; Desarnaud, F.; Makotkine, I.; Lehrner, A.L.; Koch, E.; Flory, J.D.; Buxbaum, J.D.; Meaney, M.J.; Bierer, L.M. Epigenetic biomarkers as predictors and correlates of symptom improvement following psychotherapy in combat veterans with ptsd. *Front Psychiatry* **2013**, *4*, 118. 10.3389/fpsy.2013.00118
99. Katarina Kouter, M.N.P., Gordana Nedic Erjavec, Tina Milos, Lucija Tudor,, Suzana Uzun, N.M., Nela Pivac, Alja Videtic Paska. Difference in methylation and expression of brain-derived neurotrophic factor in alzheimer's disease and mild cognitive impairment. *Biomedicines* **2023**, *11*, 235. 10.3390/biomedicines11020235
